# Supplementary material for: A truncating mutation in CEP55 is the likely cause of MARCH, a novel syndrome affecting neuronal mitosis
Source: PubMed Central journal article supplement — J Med Genet. 2017 Mar 6;54(7):490–501. doi: 10.1136/jmedgenet-2016-104296 (PMC5502313; doi:10.1136/jmedgenet-2016-104296), 2017-03-06
Supplement: jmedgenet-2016-104296supp004.pdf [file jmedgenet-2016-104296supp004.pdf]

## Supplement 1 (Frosk et al. 2016) – Committee Membership

Table S1.1 FORGE Canada Steering Committee

| <b>Member</b> | <b>University</b>              |
|---------------|--------------------------------|
| K. Boycott    | University of Ottawa           |
| J. Friedman   | University of British Columbia |
| J. Michaud    | University of Montreal         |
| F. Bernier    | University of Calgary          |
| M. Brudno     | University of Toronto          |
| B. Fernandez  | Memorial University            |
| B. Knoppers   | McGill University              |
| M. Samuels    | Universite´ de Montreal        |
| S. Scherer    | University of Toronto          |

Table S1.2 Canadian Rare Diseases: Models & Mechanisms Network Committees

| <b>Scientific Steering Committee</b> |          |
|--------------------------------------|----------|
| Philip Hieter                        | Co-chair |
| Richard Rachubinski                  | Co-chair |
| Jason Berman                         | Member   |
| Kym Boycott                          | Member   |
| Philippe Campeau                     | Member   |
| Geoffrey Hicks                       | Member   |
| Anne Junker                          | Member   |
| Michel Leroux                        | Member   |
| Howard Lipshitz                      | Member   |
| Jean-Yves Masson                     | Member   |
| Christopher McMaster                 | Member   |
| Janet Rossant                        | Member   |
| Eric Shoubridge                      | Member   |

| <b>Clinical Advisory Committee</b> |          |
|------------------------------------|----------|
| Kym Boycott                        | Co-chair |
| Philippe Campeau                   | Co-chair |
| Ronald Cohn                        | Member   |
| Robert Hamilton                    | Member   |
| Anne Junker                        | Member   |
| Ian MacDonald                      | Member   |
| Stuart Turvey                      | Member   |
| Clara Van Karnebeek                | Member   |
| Jacques Michaud                    | Member   |
